# Supplementary material for: Weak Compliance Undermines the Success of No-Take Zones in a Large Government-Controlled Marine Protected Area
Source: PubMed Central journal article supplement (PMC3511441; doi:10.1371/journal.pone.0050074), 2012-11-30

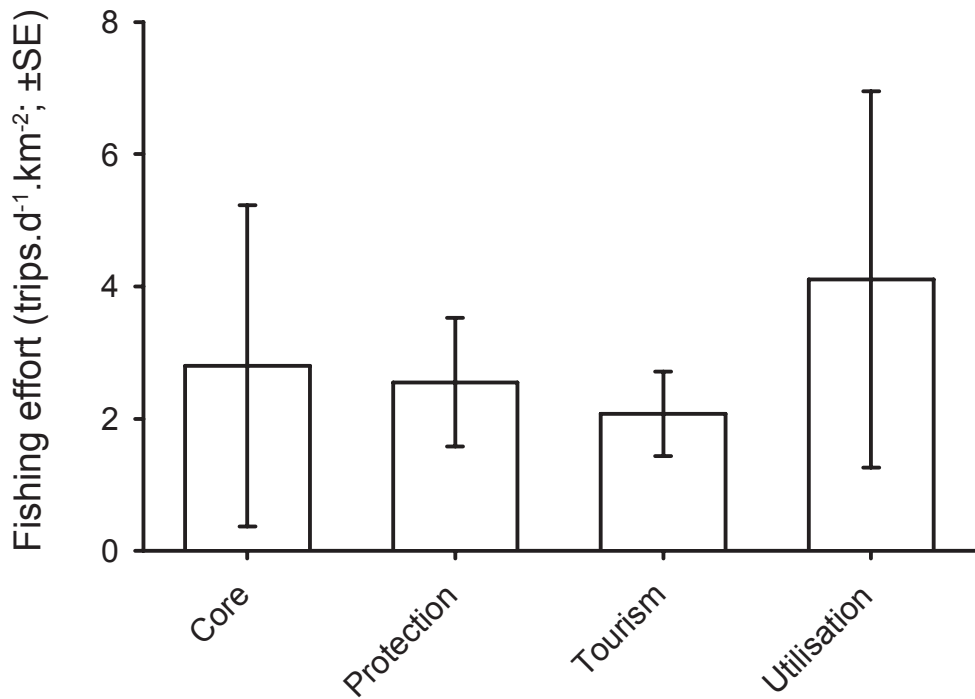

Supplement: pone.0050074.s006.pdf [file pone.0050074.s006.pdf]
